# Supplementary material
Source: HighWire-hosted journal article supplement (https://www.cmajopen.ca/highwire/filestream/88926/field_highwire_adjunct_files/0/open-2022-0118-1-at.pdf)
Supplement: open-2022-0118-1-at.pdf [file open-2022-0118-1-at.pdf]

**Appendix 1**–List of codes used to identify the study outcomes.

**Table A:** List of codes used to identify IBD-specific and IBD-related hospitalizations in the hospital discharge abstracts database. IBD-related diagnoses refer to all diagnostic codes, including the IBD-specific codes. This code list was developed by Benchimol and colleagues, 2018.\*

| CONDITION                                                                                                                                                                                                                                                                                                                                               | ICD-9          | ICD-10                                             |
|---------------------------------------------------------------------------------------------------------------------------------------------------------------------------------------------------------------------------------------------------------------------------------------------------------------------------------------------------------|----------------|----------------------------------------------------|
| <b>IBD-SPECIFIC:</b>                                                                                                                                                                                                                                                                                                                                    |                |                                                    |
| Crohn's disease                                                                                                                                                                                                                                                                                                                                         | 555.x          | K50.x                                              |
| Ulcerative colitis                                                                                                                                                                                                                                                                                                                                      | 556.x          | K51.x                                              |
| <b>IBD SIGNS/SYMPTOMS:</b>                                                                                                                                                                                                                                                                                                                              |                |                                                    |
| Anorexia                                                                                                                                                                                                                                                                                                                                                | 783.0          | R63.0                                              |
| Abnormal Weight Gain                                                                                                                                                                                                                                                                                                                                    | 783.1          | R63.5                                              |
| Abnormal Weight Loss                                                                                                                                                                                                                                                                                                                                    | 783.2          | R63.4                                              |
| Underweight                                                                                                                                                                                                                                                                                                                                             | 783.22         | R62.8                                              |
| Failure to thrive, child                                                                                                                                                                                                                                                                                                                                | 783.4          | R62.8<br>R62.9                                     |
| Failure to thrive, adult                                                                                                                                                                                                                                                                                                                                | 783.7          | R62.8<br>R62.9                                     |
| Symptoms involving digestive system, including:<br>(787.0) Nausea and vomiting (787.01) Nausea w/vomiting<br>(787.02) Nausea, alone<br>(787.03) Vomiting, alone<br>(787.1) Heartburn<br>(787.2) Dysphagia<br>(787.3) Gas/bloating<br>(787.6) Encopresis, fecal incontinence<br>(787.9) Other symptoms involving digestive system (787.91) Diarrhea, NOS | 787.x          | R11.x<br>R12.x<br>R13.x<br>R14.x<br>R15.x<br>R19.x |
| Abdominal pain                                                                                                                                                                                                                                                                                                                                          | 789.0          | R10.x                                              |
| Dyspepsia                                                                                                                                                                                                                                                                                                                                               | 536.8          | K30.x                                              |
| Cachexia                                                                                                                                                                                                                                                                                                                                                | 799.4          | R64.x                                              |
| Esophagitis                                                                                                                                                                                                                                                                                                                                             | 530.1          | K20.x<br>K21.x                                     |
| Esophagial ulcer                                                                                                                                                                                                                                                                                                                                        | 530.2          | K22.1                                              |
| Gastric ulcer                                                                                                                                                                                                                                                                                                                                           | 531.x          | K25.x                                              |
| Duodenal ulcer                                                                                                                                                                                                                                                                                                                                          | 532.x          | K26.x                                              |
| Peptic ulcer                                                                                                                                                                                                                                                                                                                                            | 533.x          | K27.x                                              |
| GJ ulcer                                                                                                                                                                                                                                                                                                                                                | 534.x          | K28.x                                              |
| Gastritis/duodenitis                                                                                                                                                                                                                                                                                                                                    | 535.x          | K29.x                                              |
| Intestinal obstruction                                                                                                                                                                                                                                                                                                                                  | 560.8<br>560.9 | K31.5<br>K56.6                                     |
| Rectal/anal haemorrhage                                                                                                                                                                                                                                                                                                                                 | 569.3          | K62.5                                              |

\* Benchimol E and colleagues. Rural and urban disparities in the care of Canadian patients with inflammatory bowel disease: a population-based study. Clin Epidemiol. 2018;10:1613–26. <https://doi.org/10.2147/CLEP.S178056>

|                                                                                                                                                                                                                                                                                                                                                                                                              |                                                             |                                                                              |
|--------------------------------------------------------------------------------------------------------------------------------------------------------------------------------------------------------------------------------------------------------------------------------------------------------------------------------------------------------------------------------------------------------------|-------------------------------------------------------------|------------------------------------------------------------------------------|
| Other disorder of rectum/anus, including:<br>(569.41) Ulcer                                                                                                                                                                                                                                                                                                                                                  | 569.4                                                       | K62.6<br>K62.8                                                               |
| (569.42) Pain<br>(569.43) Sphincter tear (healed) (569.44)<br>Dysplasia<br>(569.45) Other specified, including<br>proctitis, inflammation                                                                                                                                                                                                                                                                    |                                                             |                                                                              |
| Abscess of the intestine                                                                                                                                                                                                                                                                                                                                                                                     | 569.5                                                       | K63.0                                                                        |
| Other disorders of intestine, including:<br>(569.81) Fistula (excl rectum) (569.82) Ulcer<br>of intestine (569.83) Perforation<br>(569.84) Angiodysplasia, no haemorrhage<br>(569.85) Angiodysplasia, with haemorrhage<br>(569.86) Dieulafoy<br>(569.89) Other, including:<br>- Enteroptosis<br>- Granuloma of intestine<br>- Prolapse of intestine<br>- Pericolitis<br>- Perisigmoiditis<br>- Visceroptosis | 569.8                                                       | K63.2<br>K63.3<br>K63.1<br>K55.2<br>K63.8                                    |
| Malabsorption                                                                                                                                                                                                                                                                                                                                                                                                | 262.x<br>263.0<br>263.1<br>263.2<br>263.9<br>579.8<br>579.9 | E43.x<br>E44.0<br>E44.1<br>E45.x<br>E46.x<br>K90.8<br>K90.9                  |
| <b>EXTRA-INTESTINAL MANIFESTATIONS:</b>                                                                                                                                                                                                                                                                                                                                                                      |                                                             |                                                                              |
| Anal Fistula                                                                                                                                                                                                                                                                                                                                                                                                 | 565.1                                                       | K60.3                                                                        |
| Anal Abscess                                                                                                                                                                                                                                                                                                                                                                                                 | 566.x                                                       | K61.0<br>K61.1<br>K61.2<br>K61.3<br>K61.4                                    |
| Ureteral Fistula                                                                                                                                                                                                                                                                                                                                                                                             | 593.8                                                       | N28.81<br>N28.88                                                             |
| Urethral Fistula                                                                                                                                                                                                                                                                                                                                                                                             | 599.1                                                       | N36.0                                                                        |
| Fistula of stomach & duodenum                                                                                                                                                                                                                                                                                                                                                                                | 537.4                                                       | K31.6                                                                        |
| Vesical fistula                                                                                                                                                                                                                                                                                                                                                                                              | 596.2                                                       | N32.2                                                                        |
| Fistula involving female GU                                                                                                                                                                                                                                                                                                                                                                                  | 619.x                                                       | N82.x                                                                        |
| Haemorrhoids, including:<br>(455.9) Anal skin tags                                                                                                                                                                                                                                                                                                                                                           | 455.x                                                       | I84.x                                                                        |
| Rheumatoid arthritis                                                                                                                                                                                                                                                                                                                                                                                         | 713.1                                                       | M052<br>M053<br>M058<br>M059<br>M060<br>M061<br>M062<br>M064<br>M068<br>M069 |

|                                                                                                                                                                                                              |                         |                                                                                                                      |
|--------------------------------------------------------------------------------------------------------------------------------------------------------------------------------------------------------------|-------------------------|----------------------------------------------------------------------------------------------------------------------|
|                                                                                                                                                                                                              |                         | M070<br>M080<br>M081<br>M082<br>M083<br>M084<br>M088<br>M089<br>M090<br>M091<br>M092<br>M098<br>M130<br>M131<br>M139 |
| Arthropathy associated with GI cause                                                                                                                                                                         | 713.3                   | M074<br>M075<br>M076                                                                                                 |
| Inflammatory spondylopathies,<br>including:<br>(720.0) Ankylosing spondylitis<br>(720.1) Spinal enthesopathy<br>(720.2) Sacroiliitis<br>(720.8) Other inflammatory<br>(720.9) Other unspecified inflammatory | 720.x                   | M45.x<br>M46.x                                                                                                       |
| Scleritis & episcleritis                                                                                                                                                                                     | 379.x                   | H15.x                                                                                                                |
| Unspecified iridocyclitis (uveitis<br>NOS)                                                                                                                                                                   | 364.3                   | H20.9                                                                                                                |
| Chorioretinitis, unspecified<br>(unveitis, posterior NOS)                                                                                                                                                    | 363.2                   | H30.9                                                                                                                |
| Acute and subacute iridocyclitis                                                                                                                                                                             | 364.0                   | H20.0                                                                                                                |
| Erythema nodosum                                                                                                                                                                                             | 695.2                   | L52                                                                                                                  |
| Pyoderma                                                                                                                                                                                                     | 686.0                   | L08.0                                                                                                                |
| Pyogenic granuloma of the skin and<br>soft tissue                                                                                                                                                            | 686.1                   | L98.0                                                                                                                |
| Oral aphthae                                                                                                                                                                                                 | 528.2                   | K12.0                                                                                                                |
| Short stature                                                                                                                                                                                                | 783.4                   | E34.3                                                                                                                |
| Osteoporosis                                                                                                                                                                                                 | 733.0<br>733.1          | M80.x<br>M81.x<br>M82.x<br>M83.x                                                                                     |
| Osteomyelitis                                                                                                                                                                                                | 730.0<br>730.1<br>730.2 | M86.x                                                                                                                |
| Acute glomerulonephritis                                                                                                                                                                                     | 580.x                   | N00.x                                                                                                                |
| Nephrolithiasis                                                                                                                                                                                              | 592.x                   | N20.x                                                                                                                |
| Primary Sclerosing Cholangitis                                                                                                                                                                               | 576.1                   | K83.0                                                                                                                |
| Venous embolism/thrombosis                                                                                                                                                                                   | 453.x                   | I82.x                                                                                                                |

**Table B:** List of Canadian Classification of Health Interventions (CCI) codes used to identify surgeries for IBD in the hospital discharge abstracts database. This code list was developed by Benchimol and colleagues, 2018.<sup>†</sup>

| <b>RESECTIVE SURGERY</b>                                                                                                                                                                             |                                                                                                                                                                                                                                                                                                                                                                                                                                                                                                                                                                              |
|------------------------------------------------------------------------------------------------------------------------------------------------------------------------------------------------------|------------------------------------------------------------------------------------------------------------------------------------------------------------------------------------------------------------------------------------------------------------------------------------------------------------------------------------------------------------------------------------------------------------------------------------------------------------------------------------------------------------------------------------------------------------------------------|
| <b>1.NK.87</b><br>1.NK.87.BA<br>1.NK.87.DA<br>1.NK.87.LA<br>1.NK.87.DN<br>1.NK.87.RE<br>1.NK.87.DP<br>1.NK.87.RF<br>1.NK.87.DX<br>1.NK.87.TF<br>1.NK.87.DY<br>1.NK.87.TG                             | <b>Excision partial, small intestine</b><br>Simple excision, per orifice<br>Simple excision, laparoscopic<br>Simple excision, open<br>Enterocolostomy anastomosis, laparoscopic<br>Enterocolostomy anastomosis, open<br>Enteroenterostomy anastomosis, laparoscopic<br>Enteroenterostomy anastomosis, open<br>Stoma formation with distal closure, laparoscopic<br>Stoma formation with distal closure, open<br>Stoma formation with mucous fistula, laparoscopic<br>Stoma formation with mucous fistula, open                                                               |
| <b>1.NM.87</b><br>1.NM.87.BA<br>1.NM.87.DA<br>1.NM.87.LA<br>1.NM.87.DF<br>1.NM.87.RN<br>1.NM.87.DE<br>1.NM.87.RD<br>1.NM.87.DN<br>1.NM.87.RE<br>1.NM.87.DX<br>1.NM.87.TF<br>1.NM.87.DY<br>1.NM.87.TG | <b>Excision partial, large intestine</b><br>Simple excision, per orifice<br>Simple excision, laparoscopic<br>Simple excision, open<br>Colocolostomy anastomosis, laparoscopic<br>Colocolostomy anastomosis, open<br>Colorectal anastomosis, laparoscopic<br>Colorectal anastomosis, open<br>Enterocolostomy anastomosis, laparoscopic<br>Enterocolostomy anastomosis, open<br>Stoma formation and distal closure, laparoscopic<br>Stoma formation and distal closure, open<br>Stoma formation with mucous fistula, laparoscopic<br>Stoma formation with mucous fistula, open |
| <b>1.NM.89</b><br>1.NM.89.DF<br>1.NM.89.RN<br>1.NM.89.DX<br>1.NM.89.TF                                                                                                                               | <b>Excision total, large intestine</b><br>Ileorectal anastomosis, laparoscopic<br>Ileorectal anastomosis, open<br>Stoma formation with distal closure, laparoscopic<br>Stoma formation with distal closure, open                                                                                                                                                                                                                                                                                                                                                             |
| <b>1.NM.91</b><br>1.NM.91.DF<br>1.NM.91.RN<br>1.NM.91.DE<br>1.NM.91.RD<br>1.NM.91.DN<br>1.NM.91.RE<br>1.NM.91.DX<br>1.NM.91.TF                                                                       | <b>Excision radical, large intestine (including en bloc resection)</b><br>Colocolostomy anastomosis, laparoscopic<br>Colocolostomy anastomosis, open<br>Colorectal anastomosis, laparoscopic<br>Colorectal anastomosis, open<br>Enterocolostomy anastomosis, laparoscopic<br>Enterocolostomy anastomosis, open<br>Stoma formation with distal closure, laparoscopic<br>Stoma formation with distal closure, open                                                                                                                                                             |

<sup>†</sup> Benchimol EI and colleagues. Rural and urban disparities in the care of Canadian patients with inflammatory bowel disease: a population-based study. Clin Epidemiol. 2018;10:1613–26. <https://doi.org/10.2147/CLEP.S178056>

**Table C:** List of Canadian Classification of Diagnostic (CCP) codes used to identify surgeries for IBD in the hospital discharge abstracts database. This code list was developed by Benchimol and colleagues, 2018.<sup>‡</sup>

| RESECTION/COLECTOMY FOR CD                            | COLECTOMY FOR UC                                      |
|-------------------------------------------------------|-------------------------------------------------------|
| 5741- multiple segmental resection of small intestine |                                                       |
| 5742- Another partial resection of small intestine    |                                                       |
| 5743- Total removal of small intestine                |                                                       |
| 575- partial excision of large intestine              | 575- partial excision of large intestine              |
| 5751- multiple segmental resection of large intestine | 5751- multiple segmental resection of large intestine |
| 5753-right hemicolectomy                              | 5753-right hemicolectomy                              |
| 5755-left hemicolectomy                               | 5755-left hemicolectomy                               |
| 576-total colectomy                                   | 576-total colectomy                                   |
| 5752- cecectomy                                       | 5752- cecectomy                                       |
| 5754- resection of transverse colon                   | 5754- resection of transverse colon                   |
| 5756- sigmoidectomy                                   | 5756- sigmoidectomy                                   |
| 5759- other partial excision of large intestine       | 5759- other partial excision of large intestine       |

**Table D:** List of Canadian Classification of Diagnostic (CCP) and Canadian Classification of Health Interventions (CCI) codes used to identify colon and sigmoidoscopies in the hospital discharge abstracts database.

|         | CANADIAN CLASSIFICATION OF DIAGNOSTIC – CCP                  |
|---------|--------------------------------------------------------------|
| 0120    | Nonoperative endoscopy of lower gastrointestinal tract       |
| 0122    | Other nonoperative colonoscopy                               |
| 0124    | Other nonoperative proctosigmoidoscopy                       |
| 0125    | Anoscopy                                                     |
| 5793    | Brush biopsy of large intestine                              |
| 5794    | Other biopsy of large intestine                              |
| 5795    | Biopsy of intestine, unquantified                            |
|         | CANADIAN CLASSIFICATION OF HEALTH INTERVENTIONS – CCI        |
| 2.NM.70 | Colonoscopy (for inspection) /Sigmoidoscopy (for inspection) |
| 2.NM.71 | Colonoscopy with biopsy                                      |
| 2.NQ.70 | Rectoscopy (for inspection)                                  |
| 2.NQ.71 | Biopsy of rectum                                             |

<sup>‡</sup> Benchimol E and colleagues. Rural and urban disparities in the care of Canadian patients with inflammatory bowel disease: a population-based study. Clin Epidemiol. 2018;10:1613–26. <https://doi.org/10.2147/CLEP.S178056>

**Table E:** List of drug identification numbers (DINs) used to identify medications for IBD in the prescription medication claims database. This code list was previously developed by Peña-Sánchez and colleagues, 2017.<sup>§</sup>

| GROUP            | DIN      | NAME                    | GENERIC NAME              |
|------------------|----------|-------------------------|---------------------------|
| BIOLOGICS        | 00950898 | REMICADE                | INFLIXIMAB                |
| BIOLOGICS        | 00950899 | REMICADE (EDS)          | INFLIXIMAB                |
| BIOLOGICS        | 02244016 | REMICADE (EDS)          | INFLIXIMAB                |
| BIOLOGICS        | 02258595 | HUMIRA (EDS)            | ADALIMUMAB                |
| BIOLOGICS        | 02324776 | SIMPONI (EDS)           | GOLIMUMAB                 |
| BIOLOGICS        | 02324784 | SIMPONI (EDS)           | GOLIMUMAB                 |
| BIOLOGICS        | 02331675 | CIMZIA (EDS)            | CERTOLIZUMAB PEGOL        |
| BIOLOGICS        | 02413175 | SIMPONI                 | GOLIMUMAB                 |
| BIOLOGICS        | 02413183 | SIMPONI                 | GOLIMUMAB                 |
| BIOLOGICS        | 02417472 | SIMPONI I.V.            | GOLIMUMAB                 |
| BIOLOGICS        | 02419475 | INFLECTRA               | INFLIXIMAB                |
| BIOLOGICS        | 02419483 | REMSIMA                 | INFLIXIMAB                |
| BIOLOGICS        | 02436841 | ENTYVIO                 | VEDOLIZUMAB               |
| BIOLOGICS        | 97799756 | HUMIRA PF SYRINGE (EDS) | ADALIMUMAB                |
| BIOLOGICS        | 97799757 | HUMIRA PEN (EDS)        | ADALIMUMAB                |
| BIOLOGICS        | 02320673 | STELARA                 | USTEKINUMAB               |
| BIOLOGICS        | 02320681 | STELARA                 | USTEKINUMAB               |
| BIOLOGICS        | 02459671 | STELARA                 | USTEKINUMAB               |
| IMMUNUMODULATORS | 00004596 | IMURAN                  | AZATHIOPRINE              |
| IMMUNUMODULATORS | 00004723 | PURINETHOL (EDS)        | MERCAPTOPYRINE            |
| IMMUNUMODULATORS | 00014915 | METHOTREXATE            | METHOTREXATE              |
| IMMUNUMODULATORS | 00321397 | METHOTREXATE            | METHOTREXATE              |
| IMMUNUMODULATORS | 00321400 | METHOTREXATE            | METHOTREXATE              |
| IMMUNUMODULATORS | 00519286 | METHOTREXATE            | METHOTREXATE              |
| IMMUNUMODULATORS | 00593249 | SANDIMMUNE (EDS)        | CYCLOSPORINE (T)          |
| IMMUNUMODULATORS | 00614327 | METHOTREXATE            | METHOTREXATE              |
| IMMUNUMODULATORS | 00614335 | METHOTREXATE            | METHOTREXATE              |
| IMMUNUMODULATORS | 00614343 | METHOTREXATE            | METHOTREXATE              |
| IMMUNUMODULATORS | 00632619 | METHOTREXATE            | METHOTREXATE              |
| IMMUNUMODULATORS | 00755591 | SANDIMMUNE (EDS)        | CYCLOSPORINE (TRANSPLANT) |
| IMMUNUMODULATORS | 00755605 | SANDIMMUNE (EDS)        | CYCLOSPORINE (T)          |
| IMMUNUMODULATORS | 00950513 | SANDIMMUNE (EDS)        | CYCLOSPORINE (P)          |
| IMMUNUMODULATORS | 00950521 | SANDIMMUNE (EDS)        | CYCLOSPORINE (P)          |
| IMMUNUMODULATORS | 00950548 | SANDIMMUNE (EDS)        | CYCLOSPORINE (P)          |
| IMMUNUMODULATORS | 00950556 | SANDIMMUNE (EDS)        | CYCLOSPORINE (P)          |
| IMMUNUMODULATORS | 00950792 | NEORAL (EDS)            | CYCLOSPORINE              |
| IMMUNUMODULATORS | 00950793 | NEORAL (EDS)            | CYCLOSPORINE              |
| IMMUNUMODULATORS | 00950807 | NEORAL (EDS)            | CYCLOSPORINE              |
| IMMUNUMODULATORS | 00950815 | NEORAL (EDS)            | CYCLOSPORINE              |
| IMMUNUMODULATORS | 00950823 | NEORAL (EDS)            | CYCLOSPORINE              |
| IMMUNUMODULATORS | 00950887 | CELLCEPT (EDS)          | MYCOPHENOLATE MOFETIL     |
| IMMUNUMODULATORS | 00950888 | CELLCEPT (EDS)          | MYCOPHENOLATE MOFETIL     |
| IMMUNUMODULATORS | 00950897 | MYCOPHENOLATE           | MYCOPHENOLATE MOFETIL     |

<sup>§</sup> Peña-Sánchez JN and colleagues. Impact of an integrated model of care on outcomes of patients with inflammatory bowel diseases: Evidence from a population-based study. *Journal of Crohn's and Colitis*. 2017;11(12): 1471-9. <http://dx.doi.org/10.1093/ecco-jcc/jjx106>

|                  |          |                            |                                    |
|------------------|----------|----------------------------|------------------------------------|
| IMMUNUMODULATORS | 00950937 | CELLCEPT                   | MYCOPHENOLATE MOFETIL              |
| IMMUNUMODULATORS | 00951163 | APO-MYCOPHENOLATE (EDS)    | MYCOPHENOLATE MOFETIL              |
| IMMUNUMODULATORS | 00951164 | APO-MYCOPHENOLATE (EDS)    | MYCOPHENOLATE MOFETIL              |
| IMMUNUMODULATORS | 00951165 | MYLAN-MYCOPHENOLATE (EDS)  | MYCOPHENOLATE MOFETIL              |
| IMMUNUMODULATORS | 00951166 | MYLAN-MYCOPHENOLATE (EDS)  | MYCOPHENOLATE MOFETIL              |
| IMMUNUMODULATORS | 00951167 | NOVO-MYCOPHENOLATE (EDS)   | MYCOPHENOLATE MOFETIL              |
| IMMUNUMODULATORS | 00951168 | NOVO-MYCOPHENOLATE (EDS)   | MYCOPHENOLATE MOFETIL              |
| IMMUNUMODULATORS | 00951169 | SANDOZ MYCOPHENOLATE(EDS)  | MYCOPHENOLATE MOFETIL              |
| IMMUNUMODULATORS | 00951170 | SANDOZ MYCOPHENOLATE(EDS)  | MYCOPHENOLATE MOFETIL              |
| IMMUNUMODULATORS | 00951171 | CO MYCOPHENOLATE (EDS)     | MYCOPHENOLATE MOFETIL              |
| IMMUNUMODULATORS | 00951172 | MYCOPHENOLATE MOFETIL(EDS) | MYCOPHENOLATE MOFETIL              |
| IMMUNUMODULATORS | 00951174 | MYCOPHENOLATE MOFETIL(EDS) | MYCOPHENOLATE MOFETIL              |
| IMMUNUMODULATORS | 00951175 | JAMP-MYCOPHENOLATE (EDS)   | MYCOPHENOLATE MOFETIL              |
| IMMUNUMODULATORS | 00951176 | JAMP-MYCOPHENOLATE (EDS)   | MYCOPHENOLATE MOFETIL              |
| IMMUNUMODULATORS | 01907182 | SANDIMMUNE (EDS)           | CYCLOSPORINE (T)                   |
| IMMUNUMODULATORS | 01907204 | METHOTREXATE               | METHOTREXATE                       |
| IMMUNUMODULATORS | 02099705 | METHOTREXATE               | METHOTREXATE                       |
| IMMUNUMODULATORS | 02150662 | NEORAL (EDS)               | CYCLOSPORINE (TRANSPLANT)          |
| IMMUNUMODULATORS | 02150670 | NEORAL (EDS)               | CYCLOSPORINE (TRANSPLANT)          |
| IMMUNUMODULATORS | 02150689 | NEORAL (EDS)               | CYCLOSPORINE (TRANSPLANT)          |
| IMMUNUMODULATORS | 02150697 | NEORAL (EDS)               | CYCLOSPORINE (TRANSPLANT)          |
| IMMUNUMODULATORS | 02161168 | METHOTREXATE SODIUM INJEC  | METHOTREXATE (METHOTREXATE SODIUM) |
| IMMUNUMODULATORS | 02170663 | METHOTREXATE               | METHOTREXATE                       |
| IMMUNUMODULATORS | 02170671 | METHOTREXATE               | METHOTREXATE                       |
| IMMUNUMODULATORS | 02170698 | METHOTREXATE               | METHOTREXATE                       |
| IMMUNUMODULATORS | 02182750 | METHOTREXATE               | METHOTREXATE                       |
| IMMUNUMODULATORS | 02182777 | METHOTREXATE               | METHOTREXATE                       |
| IMMUNUMODULATORS | 02182947 | METHOTREXATE               | METHOTREXATE                       |
| IMMUNUMODULATORS | 02182955 | METHOTREXATE               | METHOTREXATE                       |
| IMMUNUMODULATORS | 02182963 | APO-METHOTREXATE           | METHOTREXATE                       |
| IMMUNUMODULATORS | 02182971 | METHOTREXATE INJECTION, U  | METHOTREXATE (METHOTREXATE SODIUM) |
| IMMUNUMODULATORS | 02192748 | CELLCEPT (EDS)             | MYCOPHENOLATE MOFETIL              |
| IMMUNUMODULATORS | 02231491 | MYLAN-AZATHIOPRINE         | AZATHIOPRINE                       |
| IMMUNUMODULATORS | 02236799 | RATIO-AZATHIOPRINE         | AZATHIOPRINE                       |
| IMMUNUMODULATORS | 02236819 | TEVA-AZATHIOPRINE          | AZATHIOPRINE                       |
| IMMUNUMODULATORS | 02237484 | CELLCEPT (EDS)             | MYCOPHENOLATE MOFETIL              |

|                  |          |                               |                                       |
|------------------|----------|-------------------------------|---------------------------------------|
| IMMUNUMODULATORS | 02237671 | NEORAL (EDS)                  | CYCLOSPORINE<br>(TRANSPLANT)          |
| IMMUNUMODULATORS | 02240347 | CELLCEPT IV                   | MYCOPHENOLATE MOFETIL                 |
| IMMUNUMODULATORS | 02242145 | CELLCEPT (EDS)                | MYCOPHENOLATE MOFETIL                 |
| IMMUNUMODULATORS | 02242907 | APO-AZATHIOPRINE              | AZATHIOPRINE                          |
| IMMUNUMODULATORS | 02243371 | AZATHIOPRINE-50               | AZATHIOPRINE                          |
| IMMUNUMODULATORS | 02244324 | APO-CYCLOSPORINE (EDS)        | CYCLOSPORINE                          |
| IMMUNUMODULATORS | 02244798 | RATIO-METHOTREXATE            | METHOTREXATE                          |
| IMMUNUMODULATORS | 02244895 | IMURAN                        | AZATHIOPRINE<br>(AZATHIOPRINE SODIUM) |
| IMMUNUMODULATORS | 02248843 | NU-AZATHIOPRINE               | AZATHIOPRINE                          |
| IMMUNUMODULATORS | 02264560 | MYFORTIC (EDS)                | MYCOPHENOLATE SODIUM                  |
| IMMUNUMODULATORS | 02264579 | MYFORTIC (EDS)                | MYCOPHENOLATE SODIUM                  |
| IMMUNUMODULATORS | 02304767 | METOJECT                      | METHOTREXATE                          |
| IMMUNUMODULATORS | 02313855 | SANDOZ<br>MYCOPHENOLATE(EDS)  | MYCOPHENOLATE MOFETIL                 |
| IMMUNUMODULATORS | 02320029 | METOJECT                      | METHOTREXATE                          |
| IMMUNUMODULATORS | 02320037 | METOJECT                      | METHOTREXATE                          |
| IMMUNUMODULATORS | 02320045 | METOJECT                      | METHOTREXATE                          |
| IMMUNUMODULATORS | 02320053 | METOJECT                      | METHOTREXATE                          |
| IMMUNUMODULATORS | 02320630 | SANDOZ<br>MYCOPHENOLATE(EDS)  | MYCOPHENOLATE MOFETIL                 |
| IMMUNUMODULATORS | 02327236 | METHOTREXATE<br>INJECTION, B  | METHOTREXATE                          |
| IMMUNUMODULATORS | 02343002 | AZATHIOPRINE                  | AZATHIOPRINE                          |
| IMMUNUMODULATORS | 02348675 | NOVO-MYCOPHENOLATE<br>(EDS)   | MYCOPHENOLATE MOFETIL                 |
| IMMUNUMODULATORS | 02352559 | APO-MYCOPHENOLATE<br>(EDS)    | MYCOPHENOLATE MOFETIL                 |
| IMMUNUMODULATORS | 02352567 | APO-MYCOPHENOLATE<br>(EDS)    | MYCOPHENOLATE MOFETIL                 |
| IMMUNUMODULATORS | 02364883 | NOVO-MYCOPHENOLATE<br>(EDS)   | MYCOPHENOLATE MOFETIL                 |
| IMMUNUMODULATORS | 02370549 | MYLAN-MYCOPHENOLATE<br>(EDS)  | MYCOPHENOLATE MOFETIL                 |
| IMMUNUMODULATORS | 02371154 | MYLAN-MYCOPHENOLATE<br>(EDS)  | MYCOPHENOLATE MOFETIL                 |
| IMMUNUMODULATORS | 02372738 | APO-MYCOPHENOLIC<br>ACID(EDS) | MYCOPHENOLATE SODIUM                  |
| IMMUNUMODULATORS | 02372746 | APO-MYCOPHENOLIC<br>ACID(EDS) | MYCOPHENOLATE SODIUM                  |
| IMMUNUMODULATORS | 02378574 | MYCOPHENOLATE<br>MOFETIL(EDS) | MYCOPHENOLATE MOFETIL                 |
| IMMUNUMODULATORS | 02379996 | CO MYCOPHENOLATE (EDS)        | MYCOPHENOLATE MOFETIL                 |
| IMMUNUMODULATORS | 02380382 | JAMP-MYCOPHENOLATE<br>(EDS)   | MYCOPHENOLATE MOFETIL                 |
| IMMUNUMODULATORS | 02383780 | MYCOPHENOLATE<br>MOFETIL(EDS) | MYCOPHENOLATE MOFETIL                 |
| IMMUNUMODULATORS | 02386399 | JAMP-MYCOPHENOLATE<br>(EDS)   | MYCOPHENOLATE MOFETIL                 |
| IMMUNUMODULATORS | 02398427 | METHOTREXATE INJECTION        | METHOTREXATE                          |
| IMMUNUMODULATORS | 02415275 | MERCAPTOPYRINE<br>TABLETS(ED) | MERCAPTOPYRINE                        |



|                  |          |                           |                                         |
|------------------|----------|---------------------------|-----------------------------------------|
| IMMUNUMODULATORS | 02417626 | METHOTREXATE INJECTION, U | METHOTREXATE (METHOTREXATE SODIUM)      |
| IMMUNUMODULATORS | 02419173 | JAMP-METHOTREXATE         | METHOTREXATE (METHOTREXATE SODIUM)      |
| IMMUNUMODULATORS | 02422166 | METHOTREXATE INJECTION, B | METHOTREXATE                            |
| IMMUNUMODULATORS | 02422174 | METHOTREXATE INJECTION, B | METHOTREXATE                            |
| IMMUNUMODULATORS | 02422182 | METHOTREXATE INJECTION, B | METHOTREXATE                            |
| IMMUNUMODULATORS | 02422190 | METHOTREXATE INJECTION, B | METHOTREXATE                            |
| IMMUNUMODULATORS | 02422204 | METHOTREXATE INJECTION, B | METHOTREXATE                            |
| 5-ASA            | 00263869 | S.A.S. 500                | SULFASALAZINE (SALICYLAZOSULFAPYRIDINE) |
| 5-ASA            | 00410640 | APO SULFASALAZINE TAB 500 | SULFASALAZINE                           |
| 5-ASA            | 00445126 | S.A.S. 500                | SULFASALAZINE (SALICYLAZOSULFAPYRIDINE) |
| 5-ASA            | 00598461 | PMS-SULFASALAZINE         | SULFASALAZINE (SALICYLAZOSULFAPYRIDINE) |
| 5-ASA            | 00598488 | PMS-SULFASALAZINE         | SULFASALAZINE (SALICYLAZOSULFAPYRIDINE) |
| 5-ASA            | 00613568 | SAS ENEMA 3GM/100ML       | SULFASALAZINE                           |
| 5-ASA            | 00685925 | RATIO-SULFASALAZINE       | SULFASALAZINE (SALICYLAZOSULFAPYRIDINE) |
| 5-ASA            | 00685933 | RATIO-SULFASALAZINE       | SULFASALAZINE (SALICYLAZOSULFAPYRIDINE) |
| 5-ASA            | 01914030 | MESASAL                   | 5-AMINOSALICYLIC ACID (MESALAMINE)      |
| 5-ASA            | 01940384 | PENTASA                   | 5-AMINOSALICYLIC ACID (MESALAMINE)      |
| 5-ASA            | 01997580 | ASACOL                    | 5-AMINOSALICYLIC ACID (MESALAMINE)      |
| 5-ASA            | 02004658 | SALAZOPYRIN               | SULFASALAZINE (SALICYLAZOSULFAPYRIDINE) |
| 5-ASA            | 02004682 | SALAZOPYRIN               | SULFASALAZINE (SALICYLAZOSULFAPYRIDINE) |
| 5-ASA            | 02004690 | SALAZOPYRIN               | SULFASALAZINE (SALICYLAZOSULFAPYRIDINE) |
| 5-ASA            | 02006413 | DIPENTUM                  | OLSALAZINE SODIUM                       |
| 5-ASA            | 02063808 | DIPENTUM                  | OLSALAZINE SODIUM                       |
| 5-ASA            | 02064472 | SALAZOPYRIN               | SULFASALAZINE (SALICYLAZOSULFAPYRIDINE) |
| 5-ASA            | 02064480 | SALAZOPYRIN               | SULFASALAZINE (SALICYLAZOSULFAPYRIDINE) |
| 5-ASA            | 02064499 | SALAZOPYRIN               | SULFASALAZINE (SALICYLAZOSULFAPYRIDINE) |
| 5-ASA            | 02099675 | PENTASA                   | 5-AMINOSALICYLIC ACID (MESALAMINE)      |
| 5-ASA            | 02099683 | PENTASA                   | 5-AMINOSALICYLIC ACID (MESALAMINE)      |

|       |          |                             |                                       |
|-------|----------|-----------------------------|---------------------------------------|
| 5-ASA | 02112752 | SALOFALK                    | 5-AMINOSALICYLIC ACID<br>(MESALAMINE) |
| 5-ASA | 02112760 | SALOFALK                    | 5-AMINOSALICYLIC ACID<br>(MESALAMINE) |
| 5-ASA | 02112787 | SALOFALK                    | 5-AMINOSALICYLIC ACID<br>(MESALAMINE) |
| 5-ASA | 02112795 | SALOFALK RETENTION<br>ENEMA | 5-AMINOSALICYLIC ACID<br>(MESALAMINE) |
| 5-ASA | 02112809 | SALOFALK RETENTION<br>ENEMA | 5-AMINOSALICYLIC ACID<br>(MESALAMINE) |
| 5-ASA | 02153521 | PENTASA                     | 5-AMINOSALICYLIC ACID<br>(MESALAMINE) |
| 5-ASA | 02153556 | PENTASA                     | 5-AMINOSALICYLIC ACID<br>(MESALAMINE) |
| 5-ASA | 02153564 | PENTASA                     | 5-AMINOSALICYLIC ACID<br>(MESALAMINE) |
| 5-ASA | 02171929 | NOVO-5-ASA                  | 5-AMINOSALICYLIC ACID<br>(MESALAMINE) |
| 5-ASA | 02242146 | SALOFALK                    | 5-AMINOSALICYLIC ACID<br>(MESALAMINE) |
| 5-ASA | 02267217 | ASACOL 800                  | 5-AMINOSALICYLIC ACID<br>(MESALAMINE) |
| 5-ASA | 02297558 | MEZAVANT                    | 5-AMINOSALICYLIC ACID<br>(MESALAMINE) |
| 5-ASA | 02351463 | 5-AMINOSALICYLIC ACID       | 5-AMINOSALICYLIC ACID<br>(MESALAMINE) |
| 5-ASA | 02399466 | PENTASA                     | 5-AMINOSALICYLIC ACID<br>(MESALAMINE) |
